# Supplementary material for: Influence of Altitudes and Development Stages on the Chemical Composition, Antioxidant, and Antimicrobial Capacity of the Wild Andean Blueberry (Vaccinium floribundum Kunth)
Source: MDPI journal article supplement (doi:10.3390/molecules27217525), 2022-11-03

Location: Carchi.

Altitude: 2836 m.a.s.l

Data recollected every 2h during 10 days after recollections

Temperature (oC)  
1st. Collection (July)    2nd. Collection (September)    3rd. Collection (November)

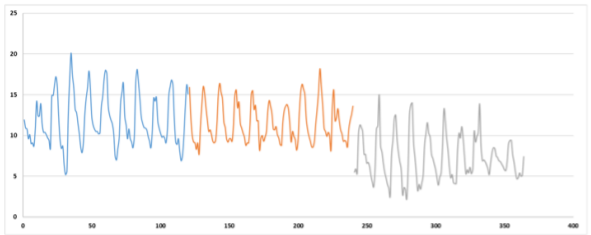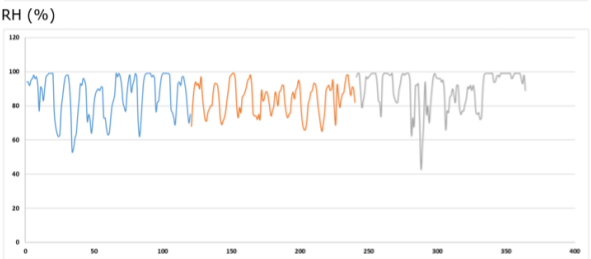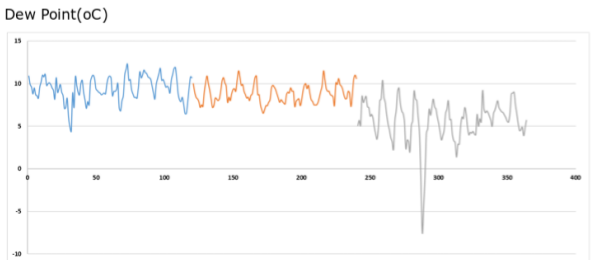

Atmospheric pressure (hpa)  
1st. Collection (July)    2nd. Collection (September)    3rd. Collection (November)

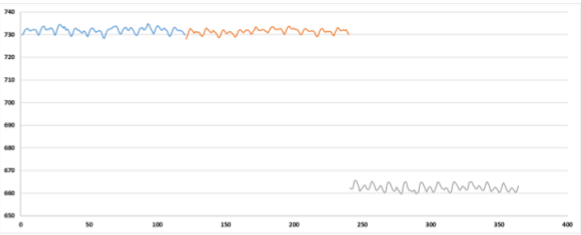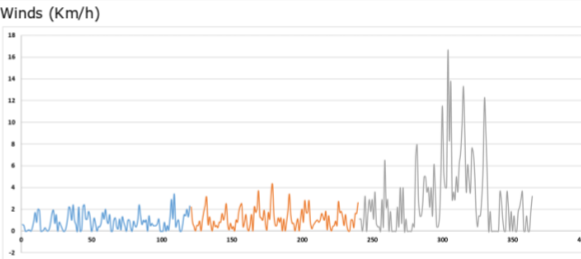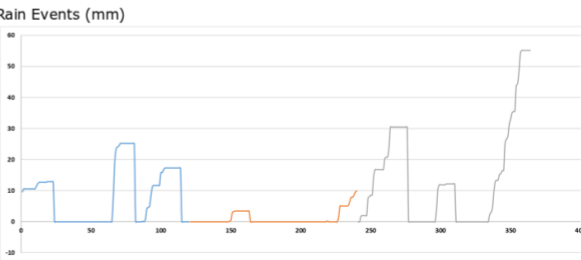

Location: Zuleta.

Altitude: 3641 m.a.s.l

Data recollected every 2h during 10 days after recollections

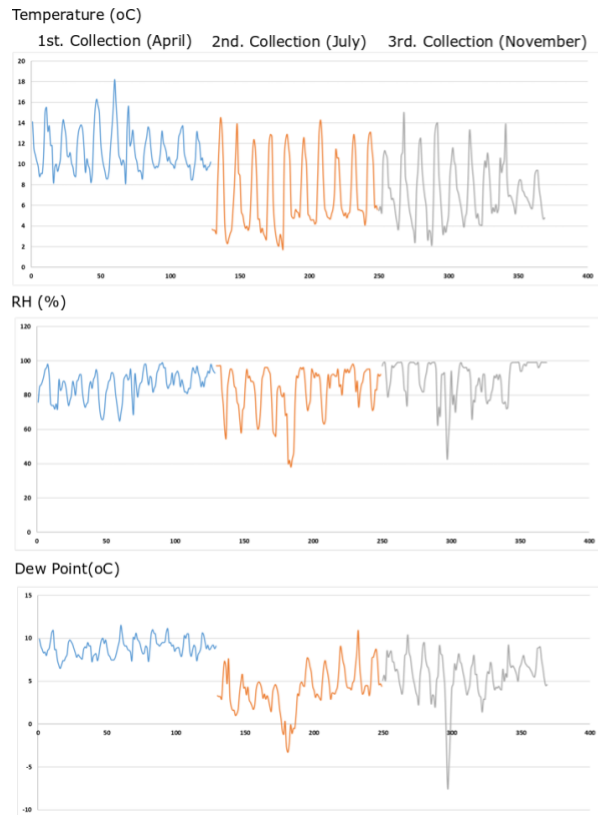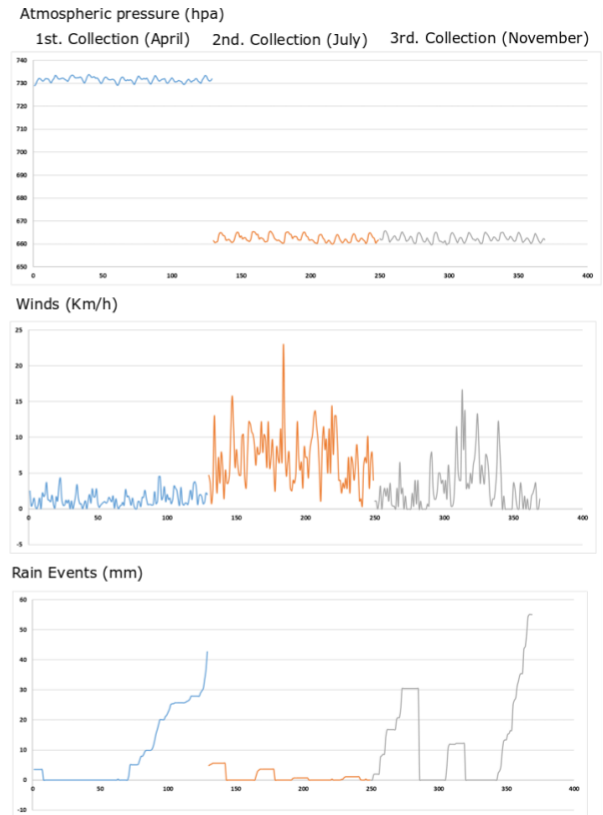

Supplement: s1 [file s1]
